# Supplementary material for: Oncogenic Ras triggers hyperproliferation and impairs polarized colonic morphogenesis by autocrine ErbB3 signaling
Source: PubMed Central journal article supplement (PMC5288203; doi:10.18632/oncotarget.10658), 2016-07-18
Supplement: oncotarget-07-53526-s001.pdf [file oncotarget-07-53526-s001.pdf]

## **Oncogenic Ras triggers hyperproliferation and impairs polarized colonic morphogenesis by autocrine ErbB3 signaling**

### **SUPPLEMENTARY DATA**

### **REFERENCE**

1. Grimm C, Chavez L, Vilardell M, Farrall AL, Tierling S, Böhm JW, Grote P, Lienhard M, Dietrich J, Timmermann B, Walter J, Schweiger MR, Lehrach H, et al. DNA-methylome analysis of mouse intestinal adenoma identifies a tumour-specific signature that is partly conserved in human colon cancer. *PLoS genetics* 2013; 9:e1003250.

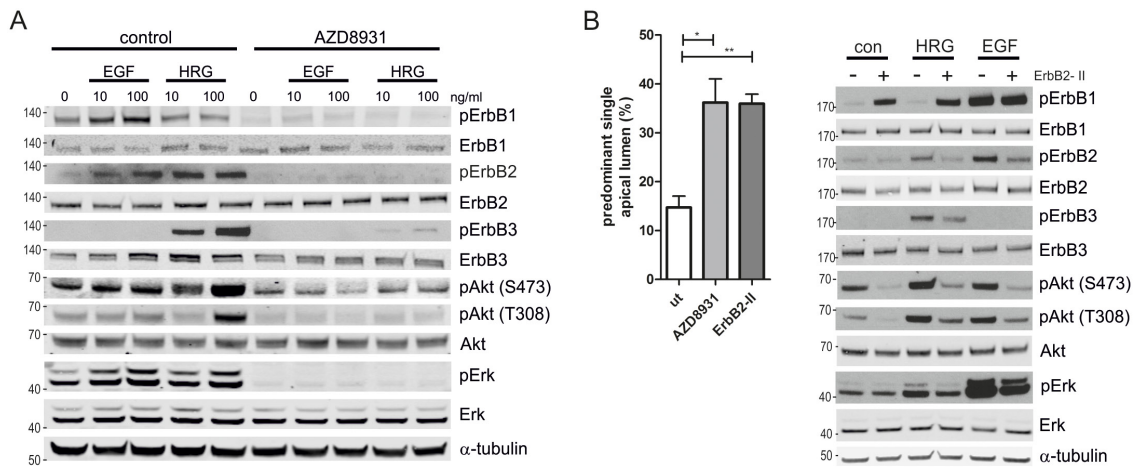

**Supplementary Figure S1: ErbB receptor inhibition by AZD8931 and ErbB2-II.** **A.** Caco-2 cells were seeded in 2D, serum-starved overnight (2% FCS) and, treated with AZD8931 (200 nM) for 1 h prior to stimulation with the indicated growth factors (10 ng/ml or 100 ng/ml) for 15 min or left untreated (control). Cells were lysed and analyzed by immunoblotting using the indicated antibodies (pErbB2 (Tyr1221/1222)). Tubulin was detected as a loading control. Shown is a representative blot (N=2). **(B, left panel)** Caco-2tet K-Ras<sup>G12V</sup> cells were seeded into 3D cultures. One day post seeding K-Ras<sup>G12V</sup>-expression was induced by dox and cultures were left untreated or treated with 100 μM ErbB2-II. Two days later CTX was added. Cultures were fixed the next day and stained with DAPI (nuclei; blue) and phalloidin (F-actin; red) (data not shown). The percentage of cysts with PSAL from was determined (n>60; N=3). **(B, right panel)** Caco-2 cells were seeded in 2D, serum-starved overnight (2% FCS) and, treated with ErbB2-II (100 μM) for 1 h prior to stimulation with the indicated growth factors (10 ng/ml) for 15 min or left untreated (control). Cells were lysed and analyzed by immunoblotting using the indicated antibodies. Tubulin was detected as a loading control.

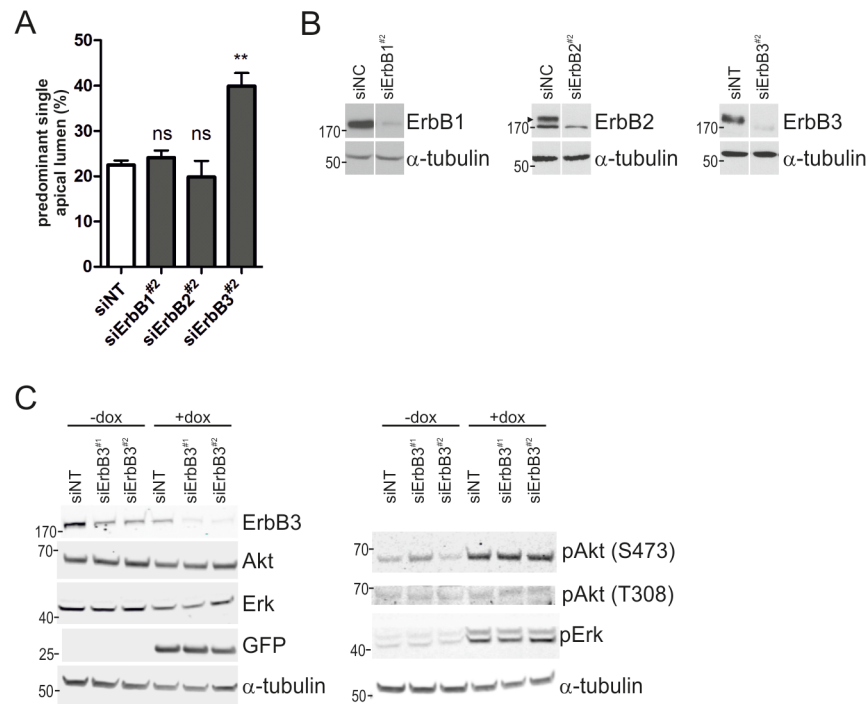

**Supplementary Figure S2: ErbB3 knockdown rescues polarized morphogenesis of Caco-2 cells expressing oncogenic K-Ras.** **A.** Caco-2tet K-Ras<sup>G12V</sup> cells were transfected with non-targeting (siNT) and ErbB-receptor specific siRNAs (#2), respectively. The next day cells were seeded into 3D culture. One day post seeding K-Ras<sup>G12V</sup> expression was induced with dox. Two days later lumen expansion was induced by addition of 100 ng/ml CTX. The next day, cultures were fixed and stained with DAPI and phalloidin (not shown). The percentage of cysts with PSAL was determined (n>70; N=3). **B.** 48 h after gene silencing, lysates were generated and analyzed by immunoblotting using the indicated antibodies. Tubulin was detected as a loading control. Specific bands are marked by arrowheads. In all cases, corresponding control and knockdown lysates were analyzed on the same blot. **C.** Caco-2tet K-Ras<sup>G12V</sup> cells were transfected with non-targeting (siNT) and two independent ErbB3-specific siRNAs (#1, #2), respectively. The next day, cells were seeded into 3D culture and K-Ras<sup>G12V</sup> expression was induced with dox one day later. Three days later, cysts were isolated and lysed. Lysates were analyzed by immunoblotting using the indicated antibodies. Tubulin was detected as a loading control. Shown is a representative blot (N=2).

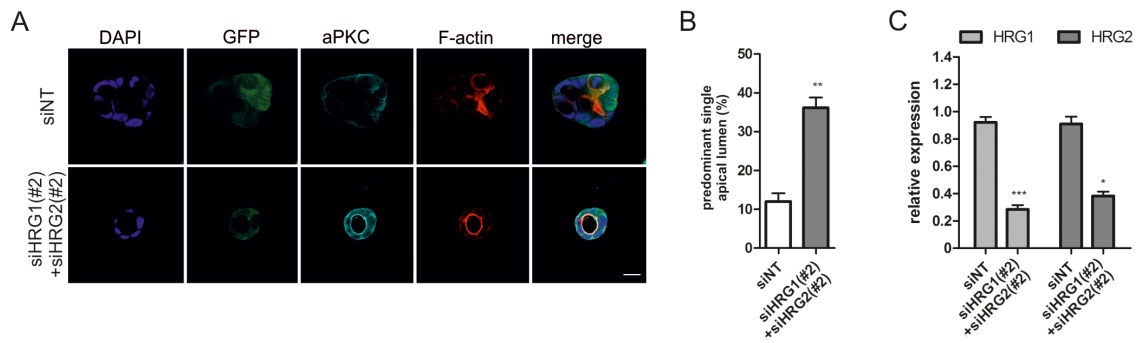

**Supplementary Figure S3: HRG knockdown by independent siRNAs in K-Ras<sup>G12V</sup> expressing Caco-2 cells.** (A+B) Caco-2tet K-Ras<sup>G12V</sup> cells were transfected with non-targeting (siNT) and a mix of HRG1- and HRG2-specific siRNAs (#2). The next day cells were seeded into 3D culture and K-Ras<sup>G12V</sup> expression was induced with dox one day later. Two days after seeding CTX was added. Cultures were fixed the next day and stained with DAPI (nuclei; blue), anti-aPKC antibody (cyan) and phalloidin (F-actin; red). GFP is coexpressed with K-Ras<sup>G12V</sup> (green). **A.** Shown are confocal sections of the midplane of representative cysts (scale: 20  $\mu$ m). **B.** The percentage of cysts with PSAL from (B) was determined (n>70; N=3). **C.** Two days after gene silencing, RNA of the transfected cells was extracted. *HRG* levels were determined by qPCR and normalized to *GAPDH* (N=3).

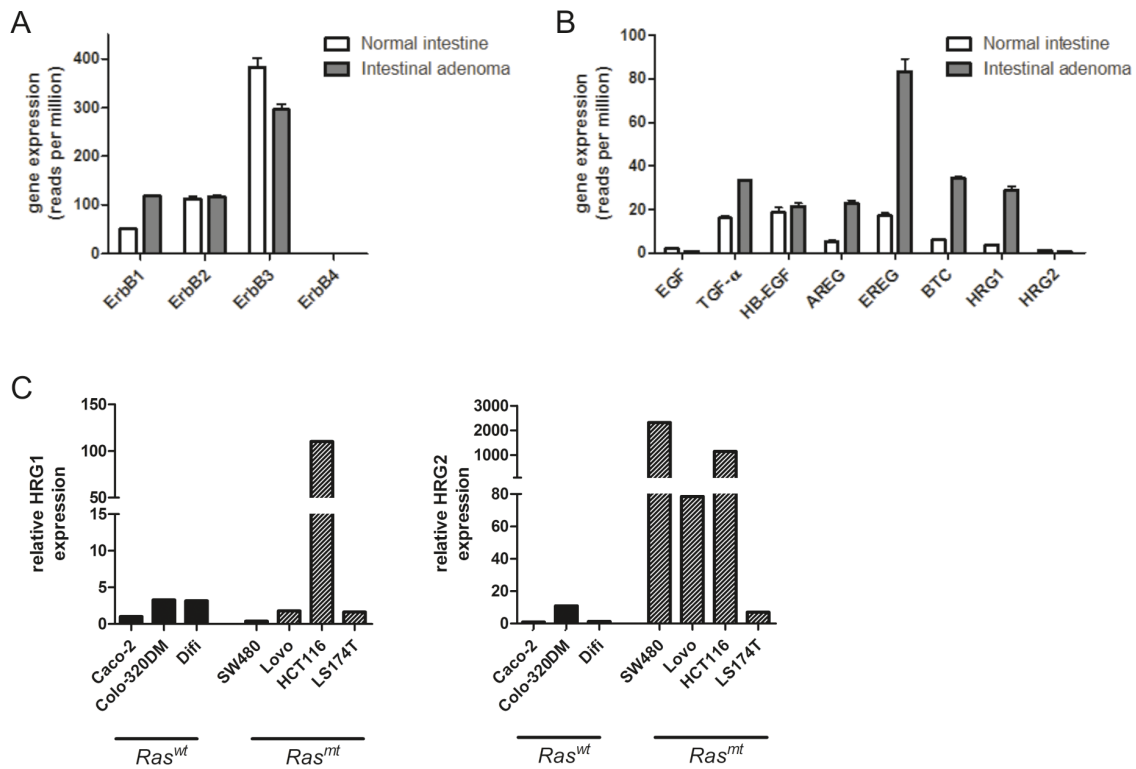

**Supplementary Figure S4: Expression of genes encoding ErbB receptors and their ligands in the normal intestinal epithelium and in intestinal adenoma of the mouse and in human CRC cell lines.** **A.** *EGFR*, *ErbB2* and *ErbB3*, but not *ErbB4*, are expressed in the normal intestine and in adenoma. **B.** Several ErbB ligands including *HRG1* are upregulated in adenoma. (A+B) Graphs show mean values of at least three biological replicates. RNAseq data are available as part of GEO data set GSE38983 (1). **(C)** The indicated human CRC cell lines were seeded into 3D culture. Three days later, cysts were isolated, RNA was extracted and *HRG1/HRG2* expression was determined by qPCR and normalized to *GAPDH* (N=2).

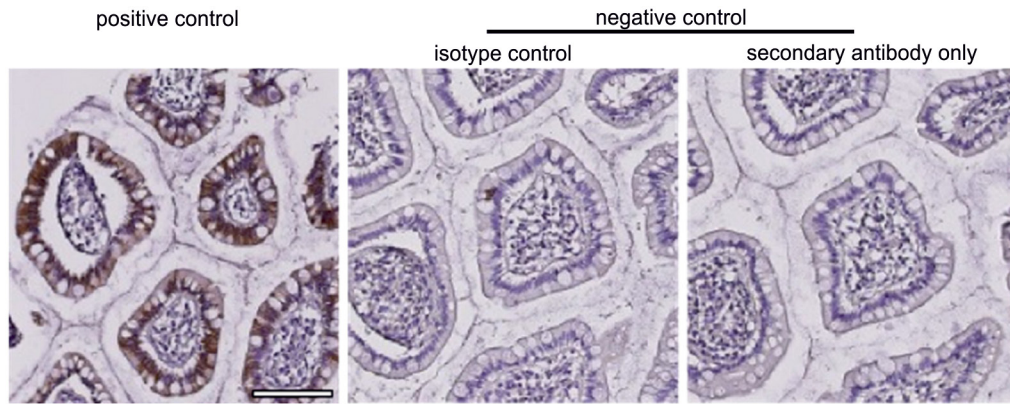

**Supplementary Figure S5: Immunohistochemical validation of ErbB3 clone SP71.** ErbB3 staining of duodenal tissue serving as a positive control. Negative controls were performed by using the isotype-specific immunoglobulin (middle) and by omitting the primary antibody (right). (scale: 100  $\mu$ m)

Supplementary Table S1: Patient and clinicopathological data of the analyzed tumor samples

|                   | mean (+/- sd)     |
|-------------------|-------------------|
| Age               | 68.76 (+/- 10.95) |
| Sex               |                   |
| male              | 197 (49.4%)       |
| female            | 202 (50.6%)       |
| Stage             |                   |
| T1                | 15 (3.8%)         |
| T2                | 88 (22.1%)        |
| T3                | 267 (66.9%)       |
| T4                | 26 (6.5%)         |
| not available     | 3 (0.8%)          |
| Nodal             |                   |
| N0                | 225 (56.4%)       |
| N1                | 121 (30.3%)       |
| N2                | 51 (12.8%)        |
| not available     | 2 (0.5%)          |
| Metastasis        |                   |
| M0                | 373 (93.5%)       |
| M1                | 23 (5.8%)         |
| not available     | 3 (0.8%)          |
| Grade             |                   |
| G1                | 27 (6.8%)         |
| G2                | 299 (74.9%)       |
| G3                | 73 (18.3%)        |
| Localization      |                   |
| Coecum            | 50 (12.5%)        |
| Colon ascendens   | 53 (13.2%)        |
| Flexur dextra     | 22 (5.5%)         |
| Colon transversum | 37 (9.3%)         |
| Flexur sinistra   | 18 (4.5%)         |
| Colon descendens  | 31 (7.8%)         |
| Sigma             | 185 (46.4%)       |
| multifocal        | 3 (0.8%)          |
